# Supplementary material
Source: Springer Nature journal article supplement (https://www.springermedizin.de/resource/supplementary/13643_2014_317_MOESM3_ESM.pdf/9681766)

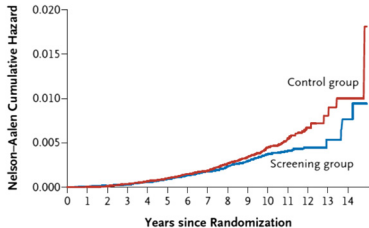

No. at Risk

|                 |        |        |        |
|-----------------|--------|--------|--------|
| Screening group | 65,078 | 58,902 | 20,288 |
| Control group   | 80,101 | 73,534 | 23,758 |

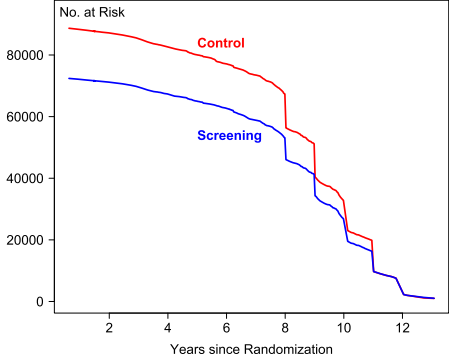

Supplement: MOESM3 [file 9681766]
